# Supplementary material for: A copper-catalyzed formal O–H insertion reaction of α-diazo-1,3-dicarbonyl compounds to carboxylic acids with the assistance of isocyanide
Source: Royal Society of Chemistry journal article supplement (doi:10.1039/c4cc00402g), 2014-01-01

# Copper-catalyzed formal O-H insertion reaction of $\alpha$ -diazo-1,3-dicarbonyl compounds to carboxylic acids with the assistance of isocyanide

Zikun Wang,<sup>a</sup> Xihe Bi,<sup>b</sup> Yongjiu Liang,<sup>a\*</sup> Peiqiu Liao,<sup>b</sup> Dewen Dong<sup>a\*</sup>

<sup>a</sup> Changchun Institute of Applied Chemistry, Chinese Academy of Sciences, Changchun 130022, China.

<sup>b</sup> Department of Chemistry, Northeast Normal University, Changchun 130024, China.

E-mail: [yjliang@ciac.ac.cn](mailto:yjliang@ciac.ac.cn); [dwdong@ciac.ac.cn](mailto:dwdong@ciac.ac.cn)

## Electronic Supplementary Information

### Contents

|                                                     |       |
|-----------------------------------------------------|-------|
| I. General information.....                         | S2    |
| II. Synthesis and analytical data of <b>3</b> ..... | S2-S7 |
| III. NMR spectra copies.....                        | S8-25 |

## I. General information

All reagents were purchased from commercial sources and used without treatment, unless otherwise indicated. The products were purified by column chromatography over silica gel.  $^1\text{H-NMR}$  and  $^{13}\text{C-NMR}$  spectra were recorded at 25 °C on a Varian 300 MHz or 400 MHz and 100 MHz spectrometer, respectively, and TMS was used as internal standard. Mass spectra were recorded on BRUKER AutoflexIII Smartbeam MS-spectrometer. High resolution mass spectra (HRMS) were recorded on Bruker microTof by using ESI method.

## II. Synthesis and analytical data of compounds 3

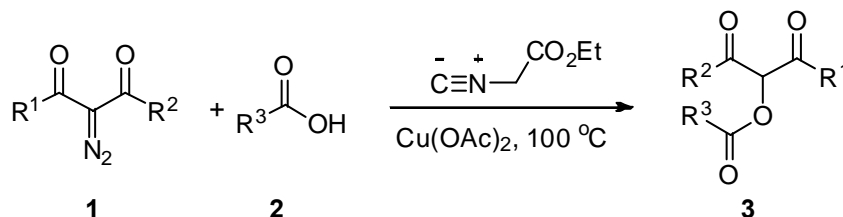

**Typical synthetic procedure** (with **3a** as an example): To a solution of  $\alpha$ -diazo- $\beta$ -oxoamide (**1a**) (1.0 mmol) and ethyl isocyanoacetate (0.5 mmol) in acetic acid (4.0 mL) was added  $\text{Cu}(\text{OAc})_2$  (0.1 mmol) in one portion at 100 °C under stirring. After being stirred for 5 hours, the reaction mixture was cooled to room temperature and saturated aqueous NaCl solution (20 mL) was added under stirring. The mixture was extracted with dichloromethane ( $3 \times 20$  mL) and the combined organic phase was washed with water ( $3 \times 20$  mL), dried over  $\text{MgSO}_4$ , filtered, and concentrated under vacuum. Purification of the crude product by flash column chromatography (silica gel; petroleum ether: ethyl acetate = 8 : 1) gave **3a** in 83% yield as a white solid.

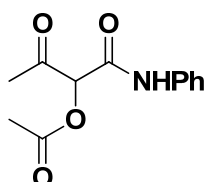

**(3a)** White solid, m.p. 66-68 °C;  $^1\text{H-NMR}$  (300 MHz,  $\text{CDCl}_3$ )  $\delta$  2.25 (s, 3H), 2.44 (s, 3H), 5.62 (s, 1H), 7.13 (t,  $J = 7.2$  Hz, 1H), 7.31 (t,  $J = 7.8$  Hz, 2H), 7.50 (d,  $J = 7.8$  Hz, 2H), 8.26 (s, 1H);  $^{13}\text{C-NMR}$  ( $\text{CDCl}_3$ , 100 MHz)  $\delta$  20.28, 27.46, 79.06, 120.12, 125.07, 128.91, 136.37, 161.08, 168.60, 199.86; **HRMS** (ESI)  $m/z$  calculated for  $\text{C}_{12}\text{H}_{13}\text{NO}_4$   $[\text{M}+\text{Na}]^+$ : 258.0740 found: 258.0742.

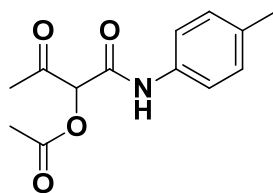

**(3b)** Yellowish solid, m.p. 43-45 °C;  $^1\text{H-NMR}$  (300 MHz,  $\text{CDCl}_3$ )  $\delta$  2.23 (s, 3H), 2.26 (s, 3H), 2.40 (s, 3H), 5.56 (s, 1H), 7.08 (d,  $J = 8.1$  Hz, 2H), 7.32 (d,  $J = 8.1$  Hz, 2H), 7.90 (s, 1H);  $^{13}\text{C-NMR}$  ( $\text{CDCl}_3$ , 100

MHz)  $\delta$  20.40, 20.76, 27.60, 79.13, 120.20, 129.48, 133.80, 134.88, 160.87, 168.54, 199.82; **HRMS** (ESI)  $m/z$  calculated for  $C_{13}H_{15}NO_4$   $[M+Na]^+$  : 272.0903 found: 272.0899.

---

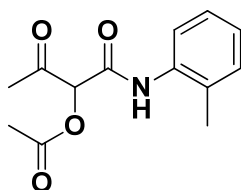

**(3c)** White solid, m.p. 68-70 °C;  **$^1H$ -NMR** (300 MHz,  $CDCl_3$ )  $\delta$  2.27 (s, 3H), 2.31 (s, 3H), 5.67 (s, 1H), 7.11 (t,  $J = 7.5$  Hz, 1H), 7.21 (d,  $J = 7.5$  Hz, 2H), 7.81 (d,  $J = 7.8$  Hz, 1H), 8.03 (s, 1H);  **$^{13}C$ -NMR** ( $CDCl_3$ , 100 MHz)  $\delta$  17.35, 20.42, 27.67, 79.19, 122.69, 125.83, 126.80, 129.21, 130.55, 134.27, 161.00, 168.51, 200.09; **HRMS** (ESI)  $m/z$  calculated for  $C_{13}H_{15}NO_4$   $[M+Na]^+$  : 272.0905 found: 272.0899.

---

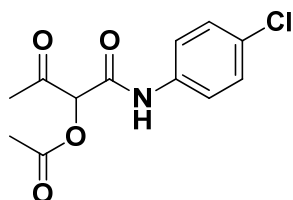

**(3d)** Yellowish solid, m.p. 66-67 °C;  **$^1H$ -NMR** (400 MHz,  $CDCl_3$ )  $\delta$  2.26 (s, 3H), 2.44 (s, 3H), 5.61 (s, 1H), 7.28 (d,  $J = 8.4$  Hz, 2H), 7.46 (d,  $J = 8.4$  Hz, 2H), 8.24 (s, 1H) ;  **$^{13}C$ -NMR** ( $CDCl_3$ , 100 MHz)  $\delta$  20.36, 27.58, 78.99, 121.40, 129.03, 130.20, 135.00, 161.07, 168.54, 199.98; **HRMS** (ESI)  $m/z$  calculated for  $C_{12}H_{12}ClNO_4$   $[M+Na]^+$  : 292.0338 found: 292.0353.

---

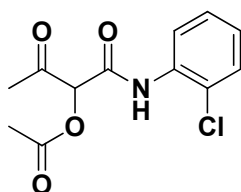

**(3e)** White solid, m.p. 77-79 °C;  **$^1H$ -NMR** (300 MHz,  $CDCl_3$ )  $\delta$  2.32 (s, 3H), 2.49 (s, 3H), 5.68 (s, 1H), 7.07-7.13 (m, 1H), 7.29-7.32 (m, 1H), 7.38-7.41 (m, 1H), 8.76 (s, 1H) ;  **$^{13}C$ -NMR** ( $CDCl_3$ , 100 MHz)  $\delta$  20.36, 27.68, 79.03, 121.42, 123.32, 125.51, 127.75, 129.15, 133.33, 161.07, 168.32, 198.99; **HRMS** (ESI)  $m/z$  calculated for  $C_{12}H_{12}ClNO_4$   $[M+Na]^+$  : 292.0348 found: 292.0353.

---

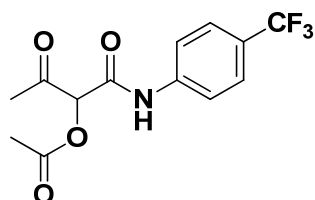

(**3f**) White solid, m.p. 74-75 °C; **<sup>1</sup>H-NMR** (400 MHz, CDCl<sub>3</sub>) δ 2.27 (s, 3H), 2.44 (s, 3H), 5.62 (s, 1H), 7.56 (d, *J* = 8.0 Hz, 2H), 7.63 (d, *J* = 8.0 Hz, 2H), 8.34 (s, 1H); **<sup>13</sup>C-NMR** (CDCl<sub>3</sub>, 100 MHz) δ 20.40, 27.62, 79.00, 119.83, 123.86 (q, <sup>1</sup>*J*<sub>CF</sub> = 270.0 Hz), 126.31, 126.98 (q, <sup>2</sup>*J*<sub>CF</sub> = 32.9 Hz), 139.53, 161.33, 168.58, 200.12; **HRMS** (ESI) *m/z* calculated for C<sub>13</sub>H<sub>12</sub>F<sub>3</sub>NO<sub>4</sub> [M+Na]<sup>+</sup> : 326.0621 found: 326.0616.

---

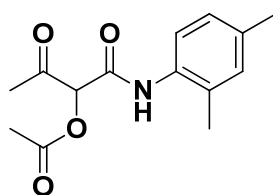

(**3g**) Yellow solid, m.p. 71-74 °C; **<sup>1</sup>H-NMR** (300 MHz, CDCl<sub>3</sub>) δ 2.21 (s, 3H), 2.28 (s, 6H), 2.45 (s, 3H), 5.64 (s, 1H), 7.01 (s, 2H), 7.57-7.60 (m, 1H), 7.97 (s, 1H); **<sup>13</sup>C-NMR** (CDCl<sub>3</sub>, 100 MHz) δ 17.27, 20.37, 20.75, 27.61, 79.18, 123.00, 127.24, 129.58, 131.17, 131.55, 135.65, 161.03, 168.50, 199.98; **HRMS** (ESI) *m/z* calculated for C<sub>14</sub>H<sub>17</sub>NO<sub>4</sub> [M+Na]<sup>+</sup> : 286.1057 found: 286.1055.

---

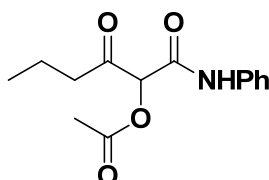

(**3h**) Yellow-oil liquid; **<sup>1</sup>H-NMR** (300 MHz, CDCl<sub>3</sub>) δ 0.92 (t, *J* = 7.5 Hz, 3H), 1.58-1.70 (m, 2H), 2.25 (s, 3H), 2.67-2.92 (m, 2H), 5.60 (s, 1H), 7.14 (t, *J* = 7.5 Hz, 1H), 7.30 (t, *J* = 7.5 Hz, 2H), 7.51 (d, *J* = 7.8 Hz, 2H), 8.18 (s, 1H); **<sup>13</sup>C-NMR** (CDCl<sub>3</sub>, 100 MHz) δ 13.26, 16.33, 20.32, 41.89, 78.89, 120.11, 125.04, 128.92, 136.42, 161.19, 168.56, 202.16; **HRMS** (ESI) *m/z* calculated for C<sub>14</sub>H<sub>17</sub>NO<sub>4</sub> [M+Na]<sup>+</sup> : 286.1048 found: 286.1055.

---

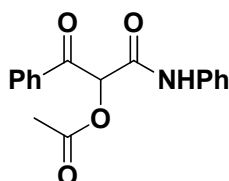

(3i) Yellow solid, m.p. 126-128 °C;  $^1\text{H-NMR}$  (300 MHz,  $\text{CDCl}_3$ )  $\delta$  2.29 (s, 3H), 6.45 (s, 1H), 7.13 (t,  $J = 7.5$  Hz, 1H), 7.31 (t,  $J = 7.5$  Hz, 2H), 7.48-7.53 (m, 4H), 7.63 (t,  $J = 7.5$  Hz, 1H), 8.11 (s, 1H), 8.18 (d,  $J = 7.5$  Hz, 2H);  $^{13}\text{C-NMR}$  ( $\text{CDCl}_3$ , 100 MHz)  $\delta$  20.49, 76.51, 120.08, 125.12, 128.63, 128.98, 129.71, 134.17, 134.30, 136.49, 161.47, 168.59, 191.59; **HRMS** (ESI)  $m/z$  calculated for  $\text{C}_{17}\text{H}_{15}\text{NO}_4$   $[\text{M}+\text{Na}]^+$  : 320.0891 found: 320.0899.

---

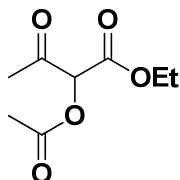

(3j) Yellow-oil liquid;  $^1\text{H-NMR}$  (300 MHz,  $\text{CDCl}_3$ )  $\delta$  1.24 (t,  $J = 7.2$  Hz, 3H), 2.15 (s, 3H), 2.27 (s, 3H), 4.21 (q,  $J = 7.2$  Hz,  $J = 14.4$  Hz, 2H), 5.42 (s, 1H);  $^{13}\text{C-NMR}$  ( $\text{CDCl}_3$ , 100 MHz)  $\delta$  13.65, 20.02, 26.82, 62.14, 77.62, 164.25, 169.14, 197.27; **HRMS** (ESI)  $m/z$  calculated for  $\text{C}_8\text{H}_{12}\text{O}_5$   $[\text{M}+\text{Na}]^+$  : 211.0586 found: 211.0582.

---

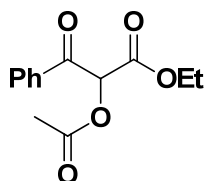

(3k) Yellow-oil liquid;  $^1\text{H-NMR}$  (300 MHz,  $\text{CDCl}_3$ )  $\delta$  1.21 (t,  $J = 7.2$  Hz, 3H), 2.23 (s, 3H), 4.24 (q,  $J = 7.2$  Hz,  $J = 14.4$  Hz, 2H), 6.32 (s, 1H), 7.50 (t,  $J = 7.5$  Hz, 2H), 7.63 (t,  $J = 7.5$  Hz, 1H), 7.99 (d,  $J = 7.5$  Hz, 2H);  $^{13}\text{C-NMR}$  ( $\text{CDCl}_3$ , 100 MHz)  $\delta$  13.72, 20.30, 62.30, 74.37, 128.31, 128.64, 129.03, 134.06, 165.01, 169.35, 189.55; **HRMS** (ESI)  $m/z$  calculated for  $\text{C}_{13}\text{H}_{14}\text{O}_5$   $[\text{M}+\text{Na}]^+$  : 273.0731 found: 273.0739.

---

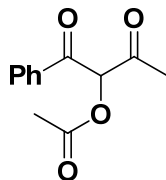

(3l) Yellow-oil liquid;  $^1\text{H-NMR}$  (300 MHz,  $\text{CDCl}_3$ )  $\delta$  2.23 (s, 3H), 2.29 (s, 3H), 6.26 (s, 1H), 7.48 (t,  $J = 7.5$  Hz, 2H), 7.62 (t,  $J = 7.5$  Hz, 1H), 8.00 (d,  $J = 7.5$  Hz, 2H);  $^{13}\text{C-NMR}$  ( $\text{CDCl}_3$ , 100 MHz)  $\delta$  20.47, 26.79, 82.15, 128.72, 129.42, 131.52, 134.22, 169.24, 190.84, 199.40; **HRMS** (ESI)  $m/z$  calculated for  $\text{C}_{12}\text{H}_{12}\text{O}_4$   $[\text{M}+\text{Na}]^+$  : 243.0622 found: 243.0633.

---

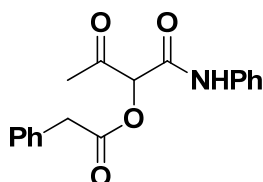

(**3m**) White solid, m.p. 62-64 °C;  $^1\text{H-NMR}$  (300 MHz,  $\text{CDCl}_3$ )  $\delta$  2.44 (s, 3H), 3.89 (d,  $J = 2.1$  Hz, 2H), 5.63 (s, 1H), 7.12-7.16 (m, 1H), 7.28-7.43 (m, 9H), 7.70 (s, 1H);  $^{13}\text{C-NMR}$  ( $\text{CDCl}_3$ , 100 MHz)  $\delta$  27.72, 40.81, 79.08, 119.95, 125.14, 127.59, 128.90, 129.01, 129.38, 133.01, 136.34, 160.82, 168.88, 199.14; **HRMS** (ESI)  $m/z$  calculated for  $\text{C}_{18}\text{H}_{17}\text{NO}_4$   $[\text{M}+\text{Na}]^+$  : 334.1049 found: 334.1055.

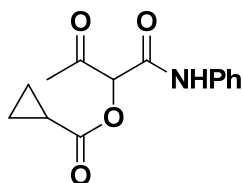

(**3n**) Yellow-oil liquid;  $^1\text{H-NMR}$  (400 MHz,  $\text{CDCl}_3$ )  $\delta$  1.00-1.10 (m, 4H), 1.82-1.83 (m, 1H), 2.43 (s, 3H), 5.63 (s, 1H), 7.15 (t,  $J = 7.8$  Hz, 1H), 7.32 (t,  $J = 7.8$  Hz, 2H), 7.51 (d,  $J = 7.8$  Hz, 2H), 8.30 (s, 1H) ;  $^{13}\text{C-NMR}$  ( $\text{CDCl}_3$ , 100 MHz)  $\delta$  9.38, 9.51, 12.42, 27.54, 78.94, 120.16, 125.07, 128.94, 136.45, 161.23, 172.77, 200.13; **HRMS** (ESI)  $m/z$  calculated for  $\text{C}_{14}\text{H}_{15}\text{NO}_4$   $[\text{M}+\text{Na}]^+$  : 284.0899 found: 284.0899.

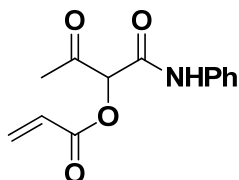

(**3o**) Red-oil liquid;  $^1\text{H-NMR}$  (400 MHz,  $\text{CDCl}_3$ )  $\delta$  2.48 (s, 3H), 5.71 (s, 1H), 6.03 (d,  $J = 10.4$  Hz, 1H), 6.30-6.36 (m, 1H), 6.59 (d,  $J = 17.2$  Hz, 1H), 7.16 (t,  $J = 7.2$  Hz, 1H), 7.34 (t,  $J = 7.6$  Hz, 2H), 7.51 (d,  $J = 7.6$  Hz, 2H), 8.12 (s, 1H) ;  $^{13}\text{C-NMR}$  ( $\text{CDCl}_3$ , 100 MHz)  $\delta$  27.64, 79.06, 120.20, 125.20, 126.46, 129.04, 133.57, 136.41, 160.97, 163.78, 199.91; **HRMS** (ESI)  $m/z$  calculated for  $\text{C}_{13}\text{H}_{13}\text{NO}_4$   $[\text{M}+\text{Na}]^+$  : 270.0733 found: 270.0742.

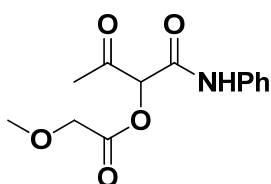

(**3p**) Yellow-oil liquid;  $^1\text{H-NMR}$  (300 MHz,  $\text{CDCl}_3$ )  $\delta$  2.46 (s, 3H), 3.50 (s, 3H), 4.28 (s, 2H), 5.72 (s, 1H), 7.15 (t,  $J = 7.5$  Hz, 1H), 7.33 (t,  $J = 7.5$  Hz, 2H), 7.50 (d,  $J = 8.1$  Hz, 2H), 8.22 (s, 1H) ;  $^{13}\text{C-NMR}$

(CDCl<sub>3</sub>, 100 MHz)  $\delta$  27.56, 59.52, 69.40, 79.07, 120.25, 125.28, 129.07, 136.36, 160.67, 168.26, 199.44;  
**HRMS** (ESI)  $m/z$  calculated for C<sub>13</sub>H<sub>15</sub>NO<sub>5</sub> [M+Na]<sup>+</sup> : 288.0841 found: 288.0848.

---

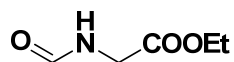

Yellow-oil liquid; **<sup>1</sup>H-NMR** (400 MHz, CDCl<sub>3</sub>)  $\delta$  1.15 (t,  $J$  = 7.2 Hz, 3H), 3.91 (d,  $J$  = 5.6 Hz, 2H), 4.07 (q,  $J$  = 7.2 Hz, 14.0 Hz, 2H), 7.08 (s, 1H), 8.10 (s, 1H) ; **<sup>13</sup>C-NMR** (CDCl<sub>3</sub>, 100 MHz)  $\delta$  13.67, 39.53, 61.10, 161.58, 169.26; **HRMS** (ESI)  $m/z$  calculated for C<sub>5</sub>H<sub>10</sub>NO<sub>3</sub> [M+H]<sup>+</sup> : 132.0800 found: 132.0661.

---

### III. NMR spectra copies

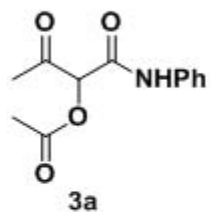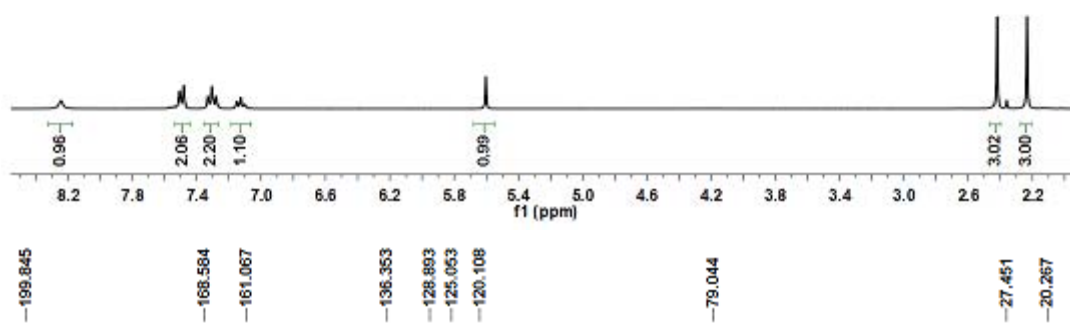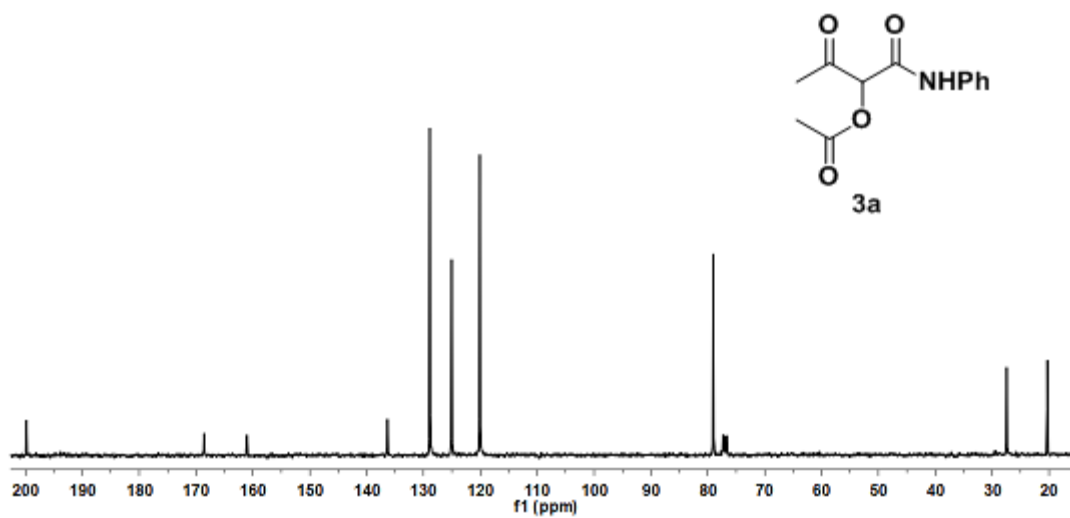



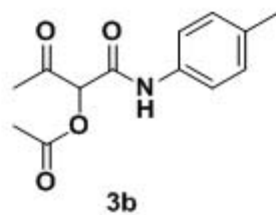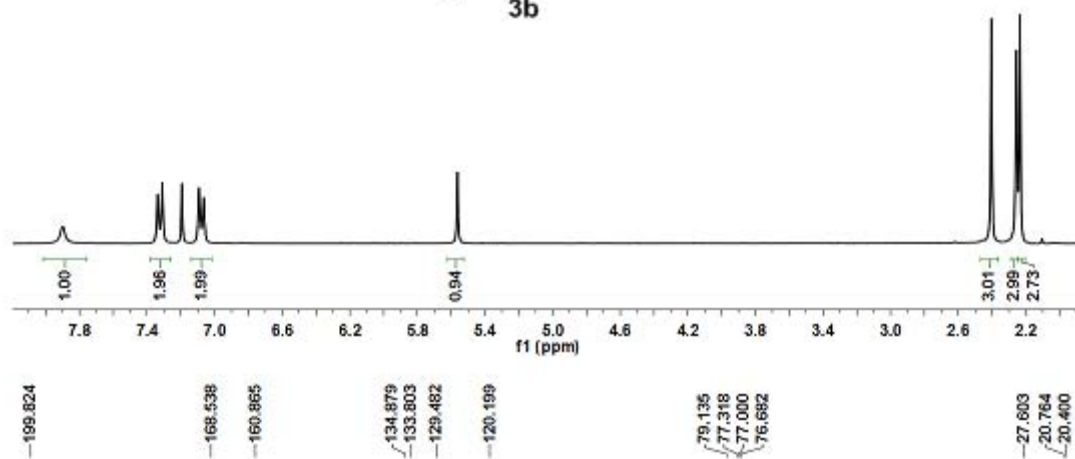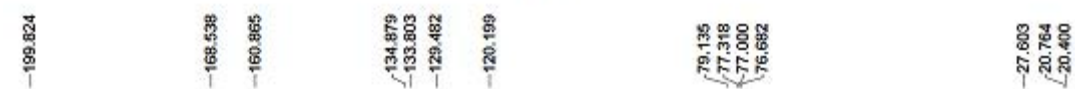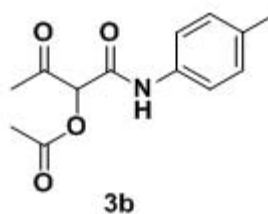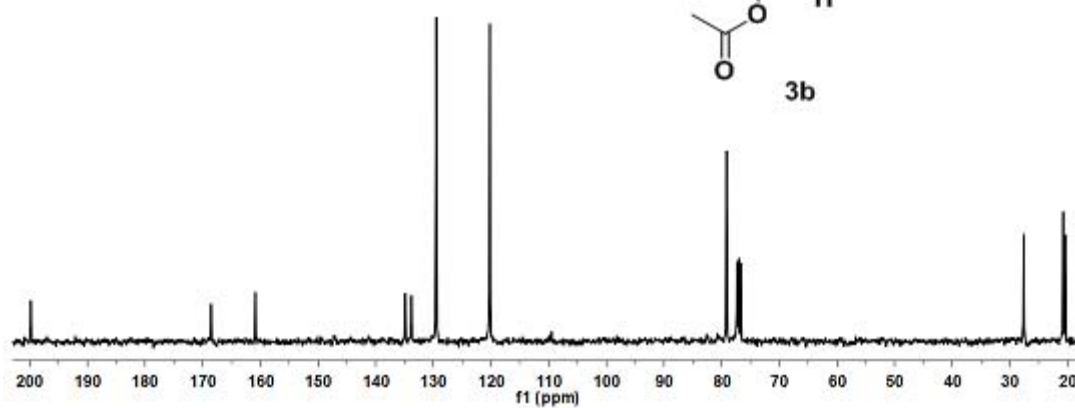

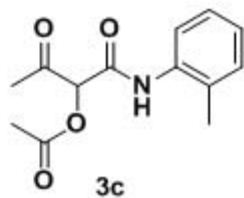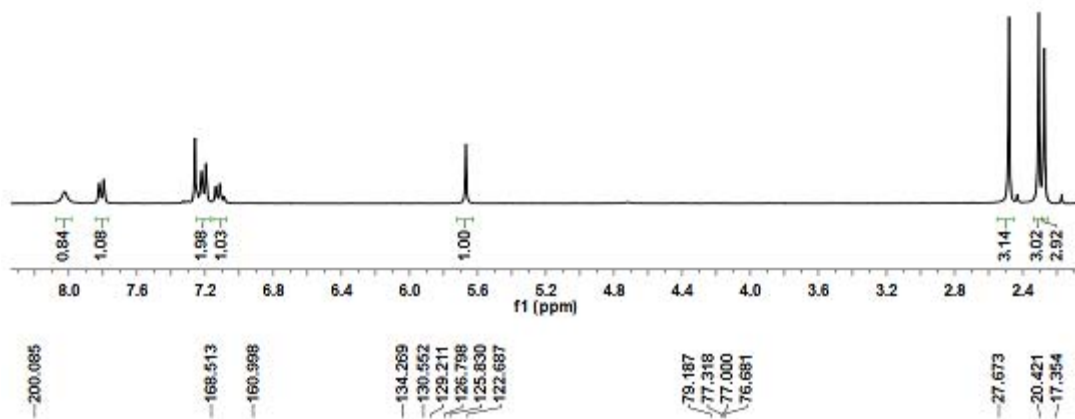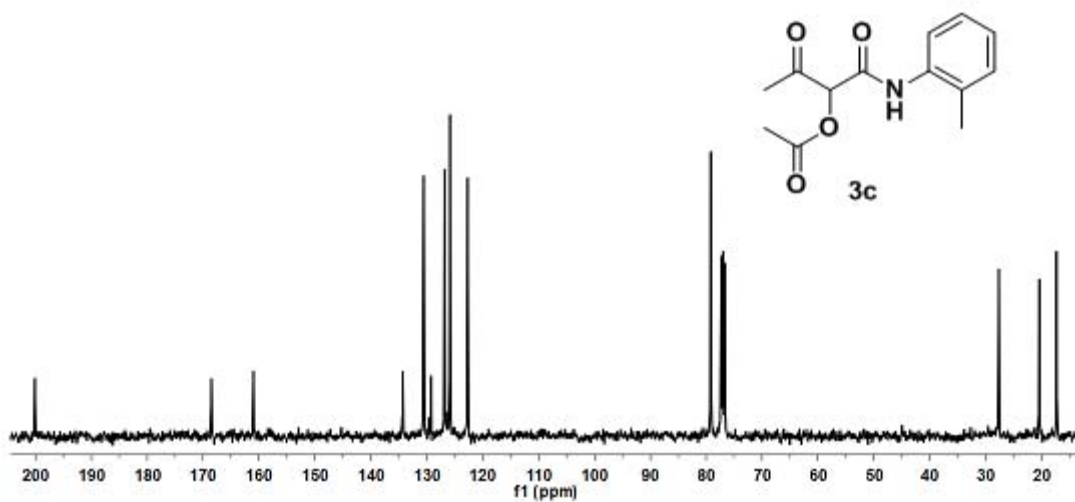

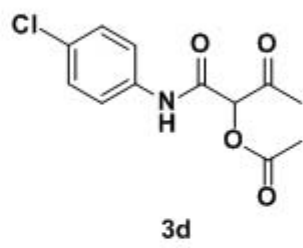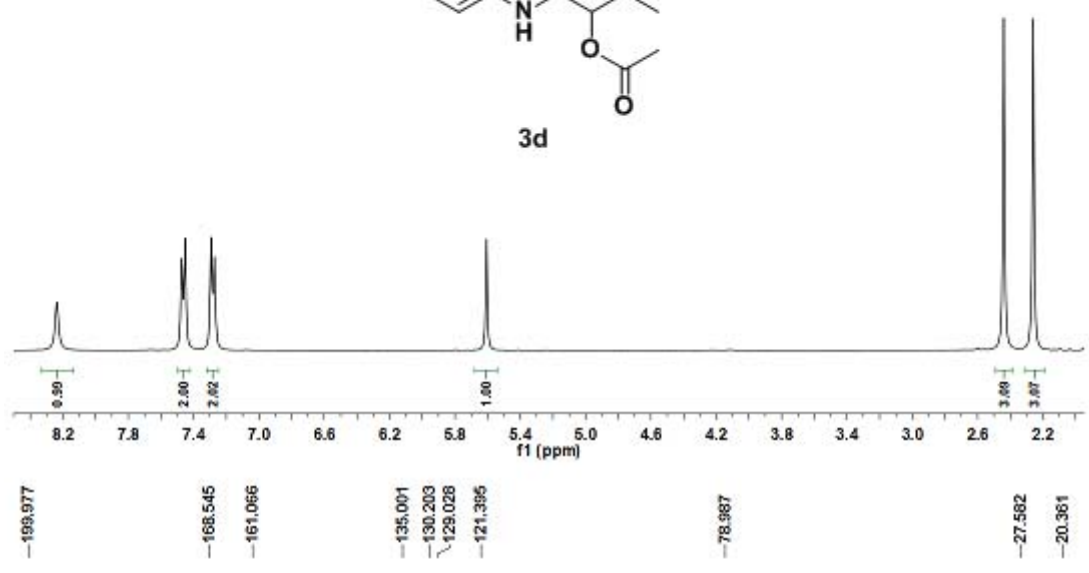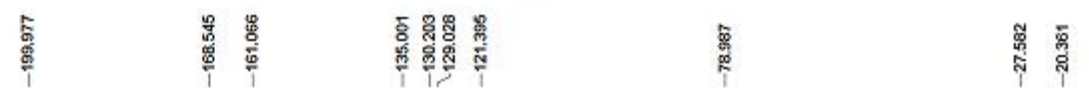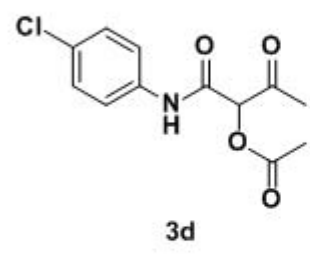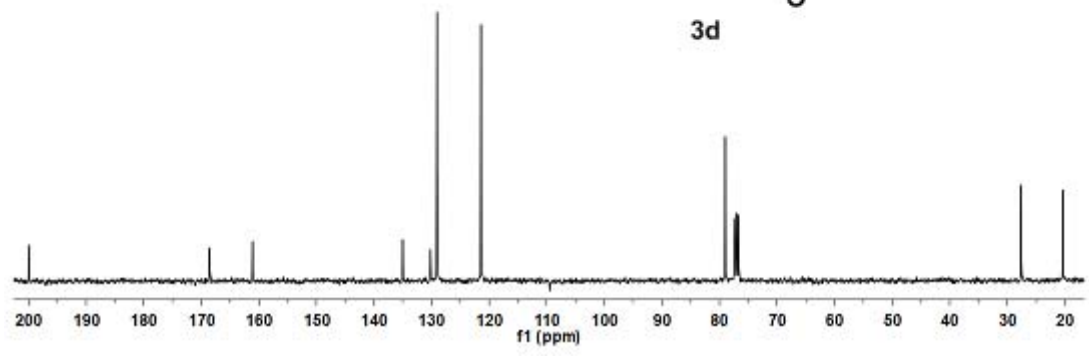

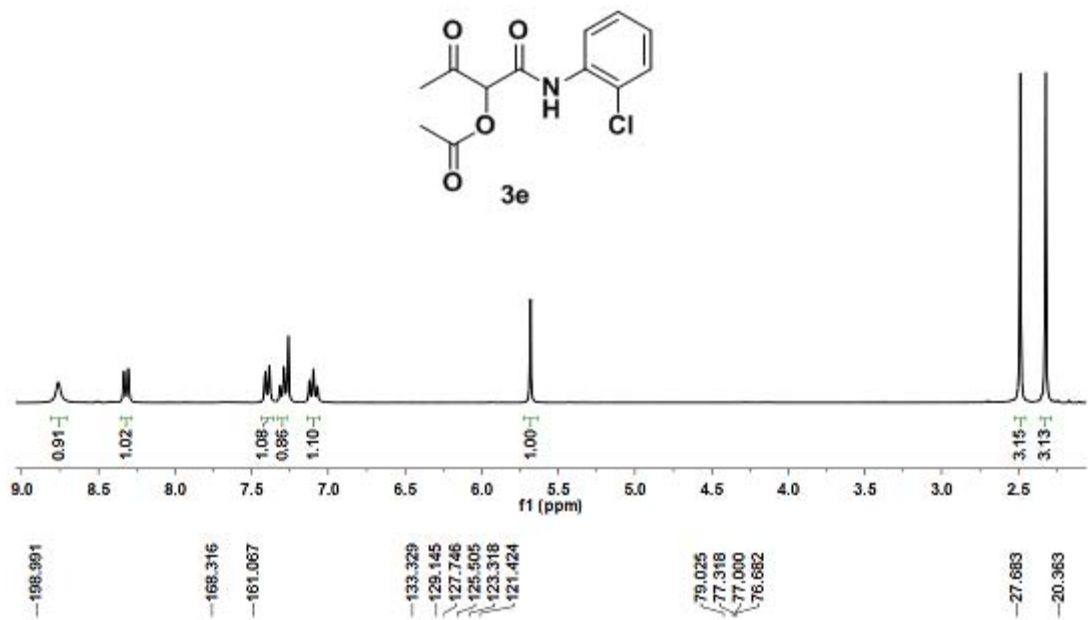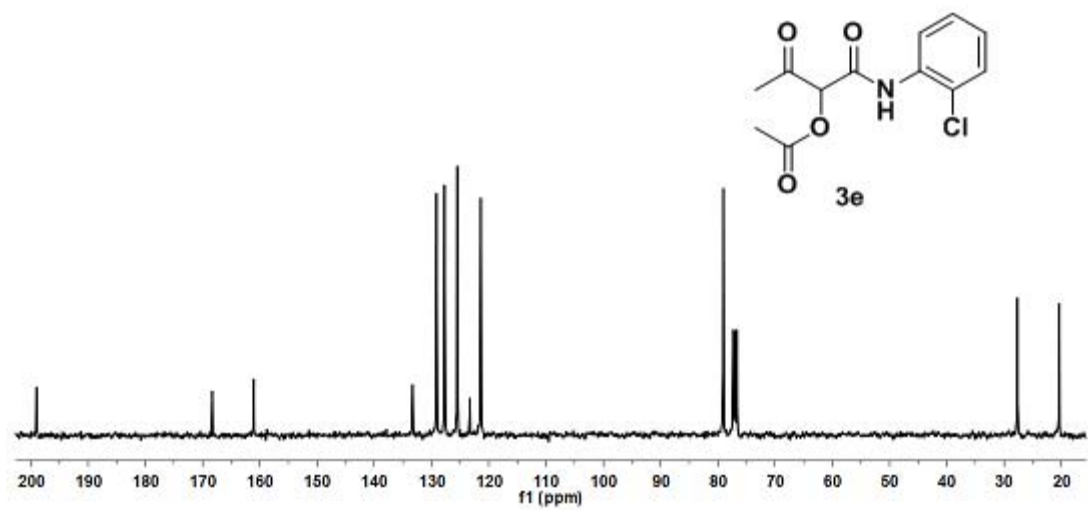

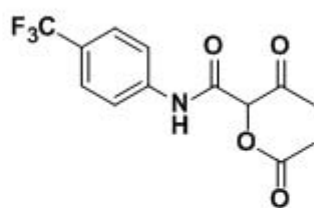

3f

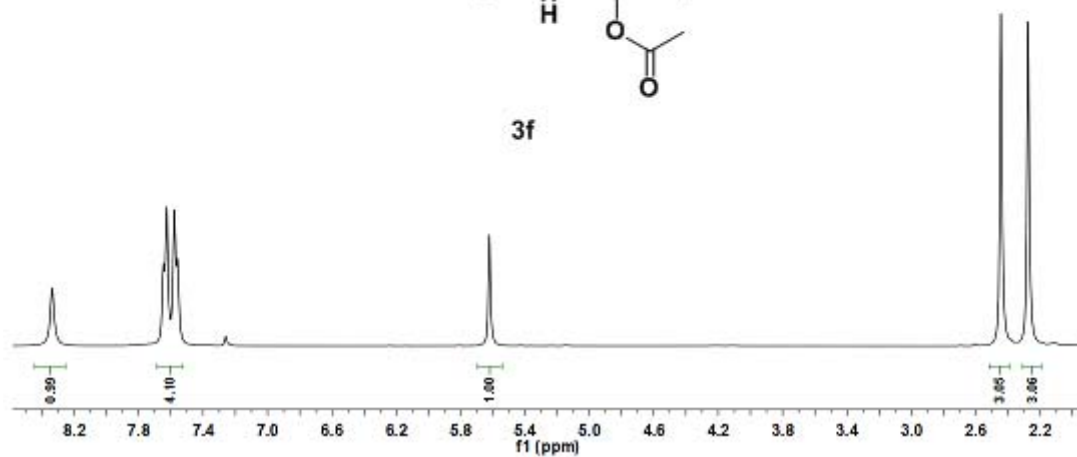

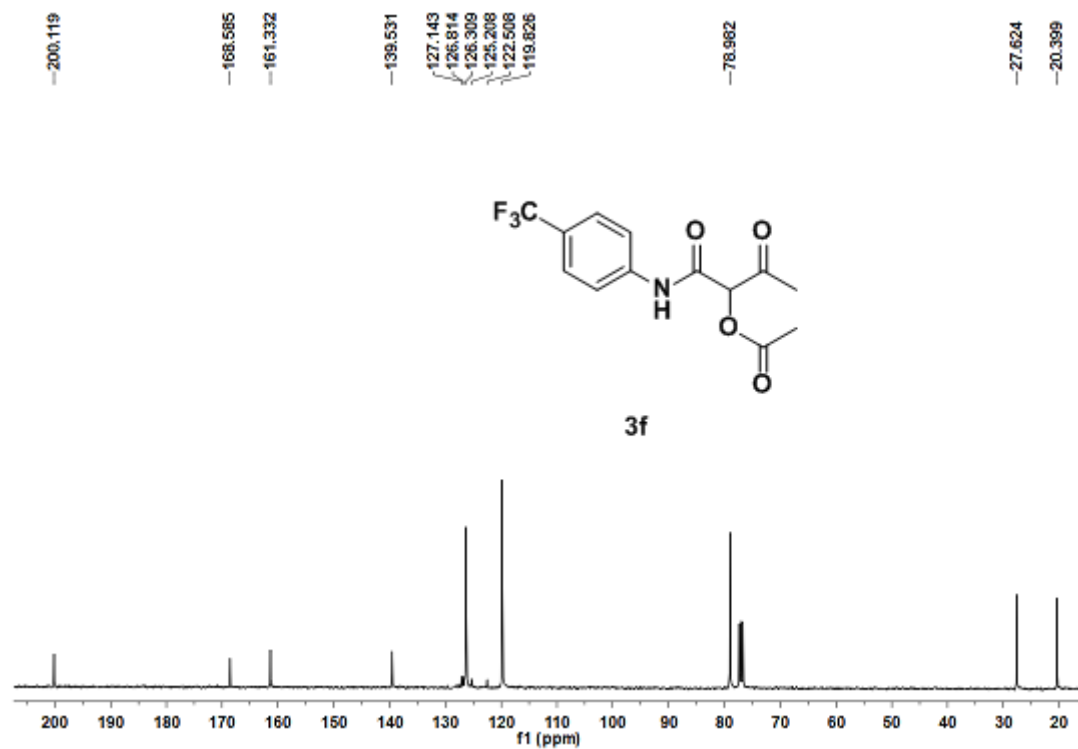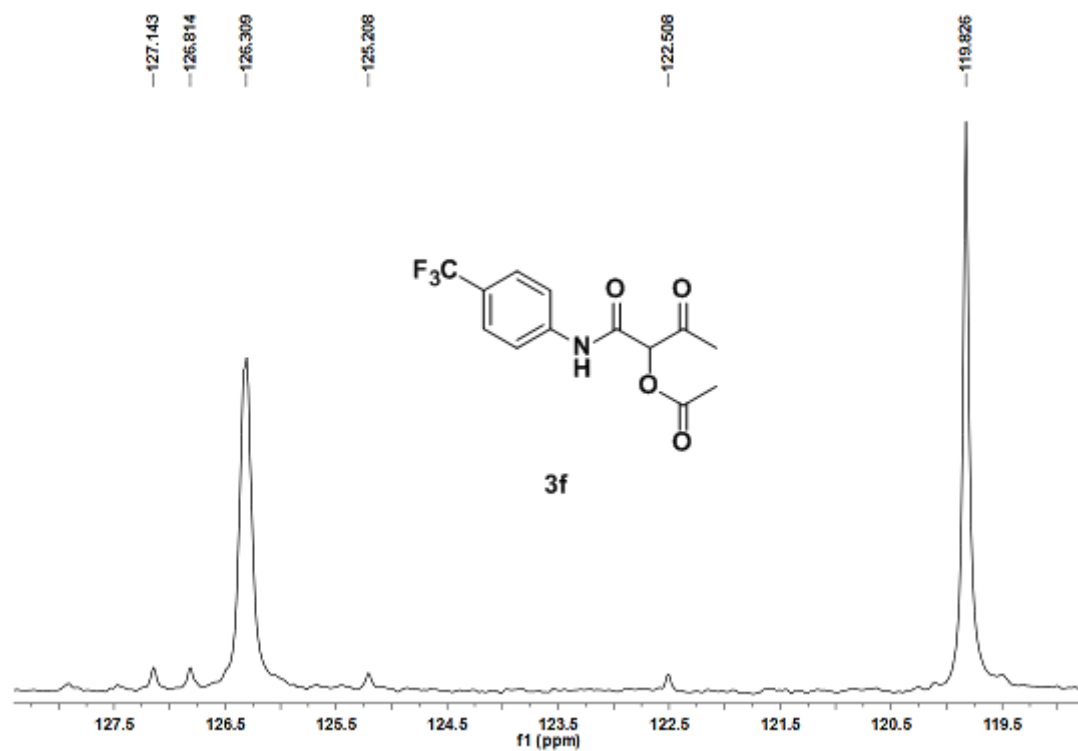

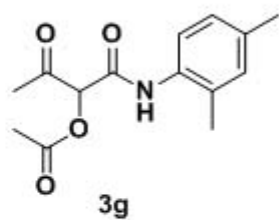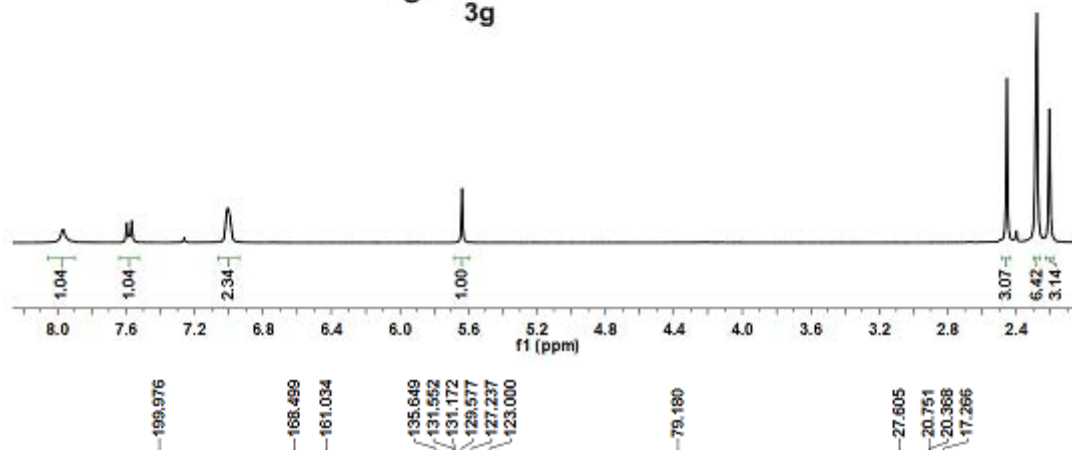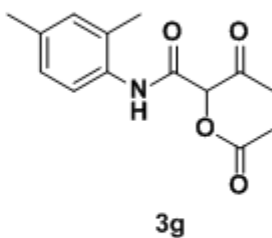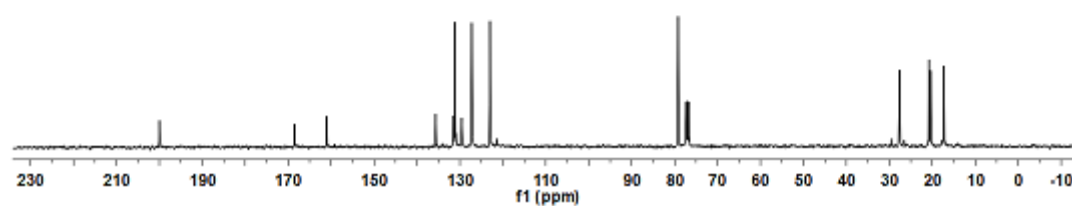

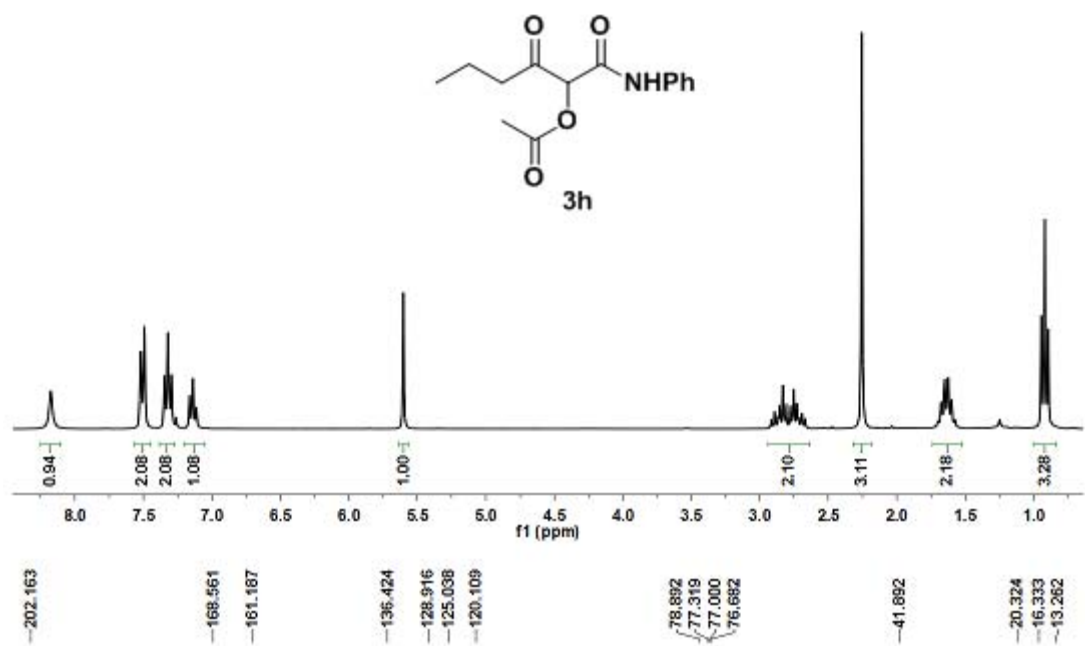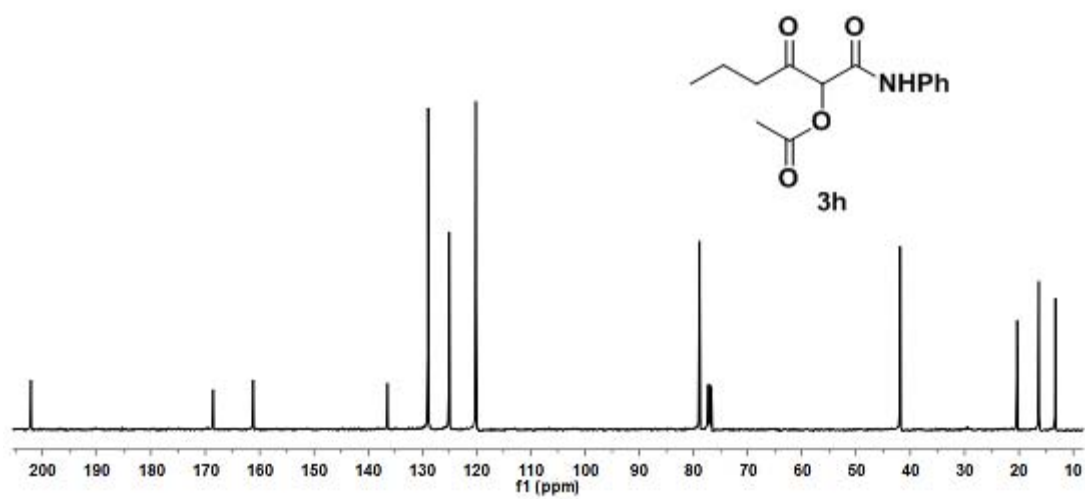



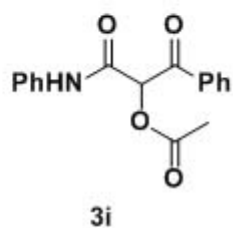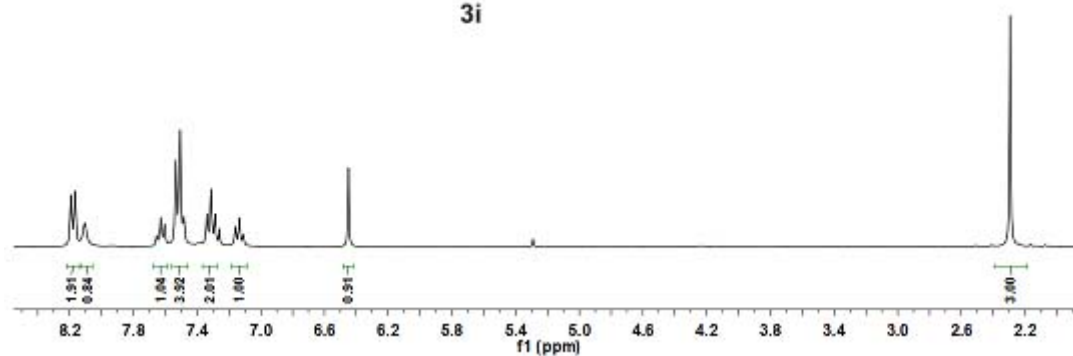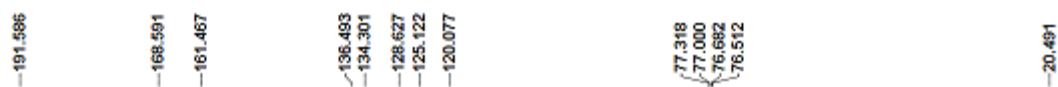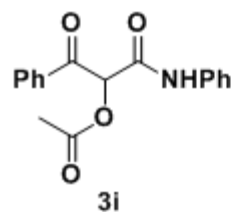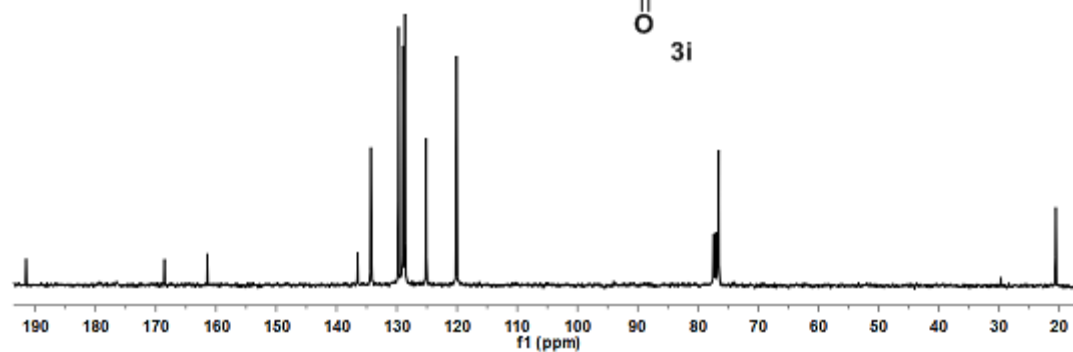

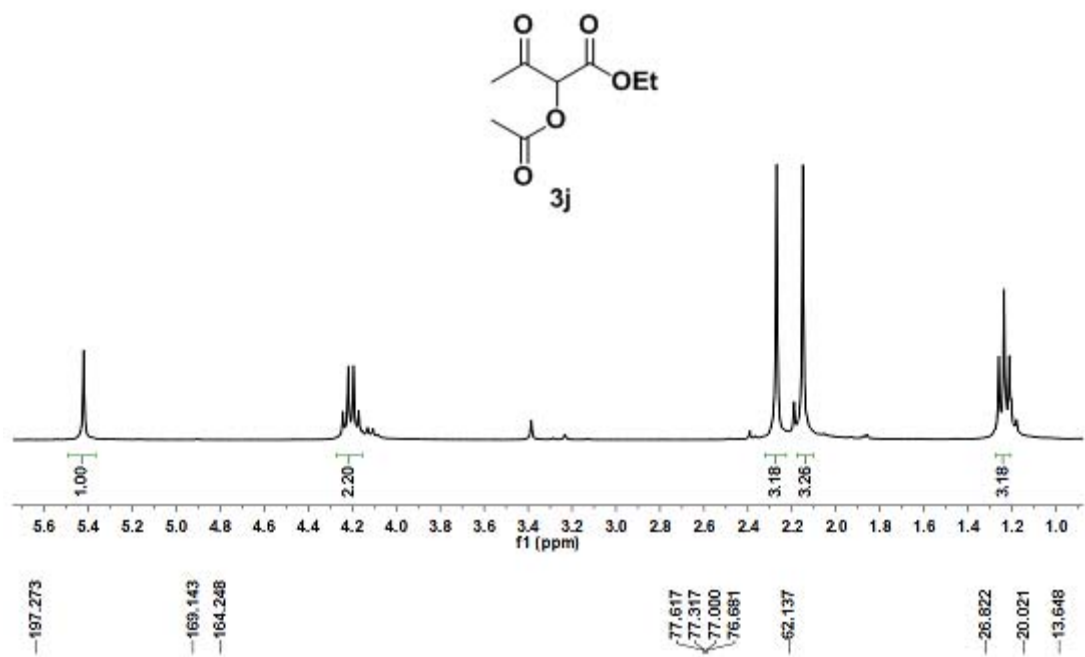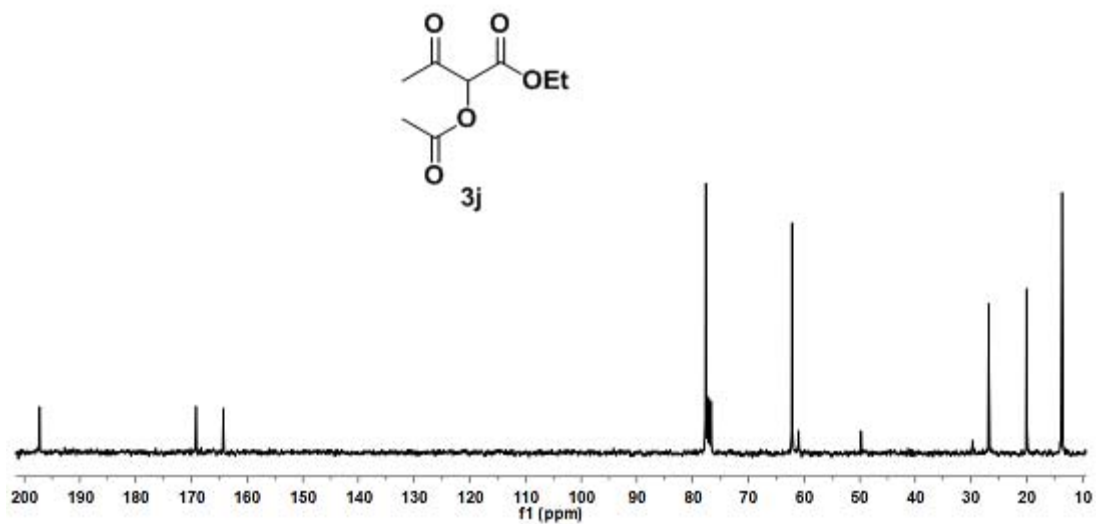

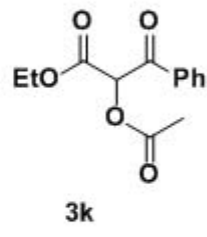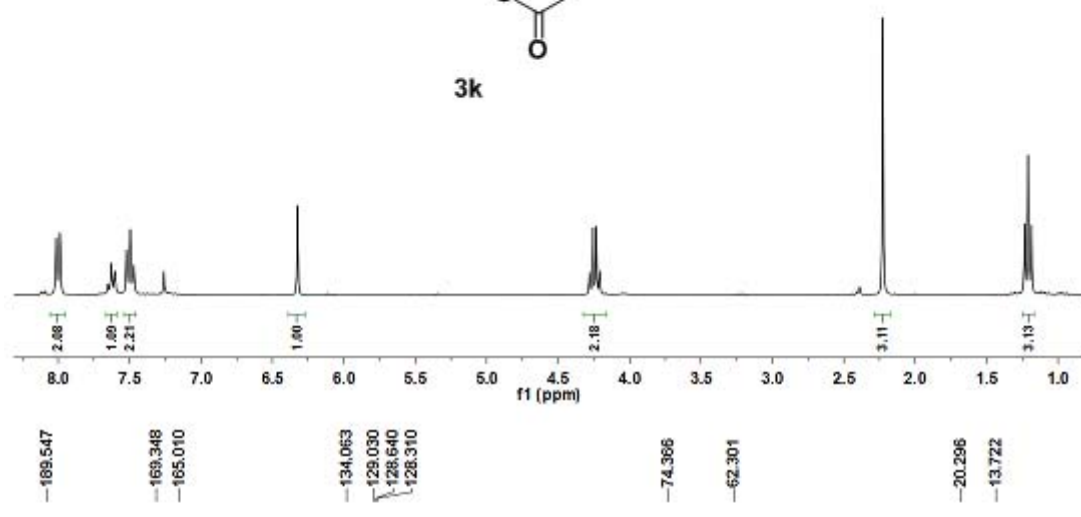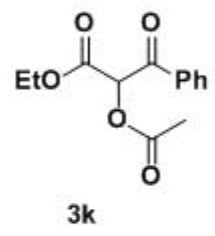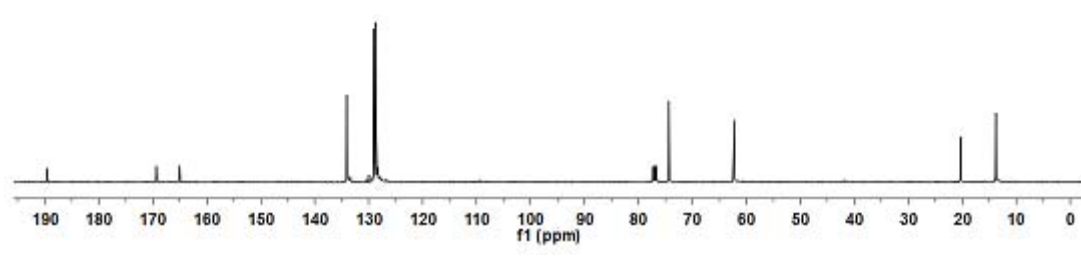

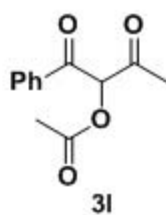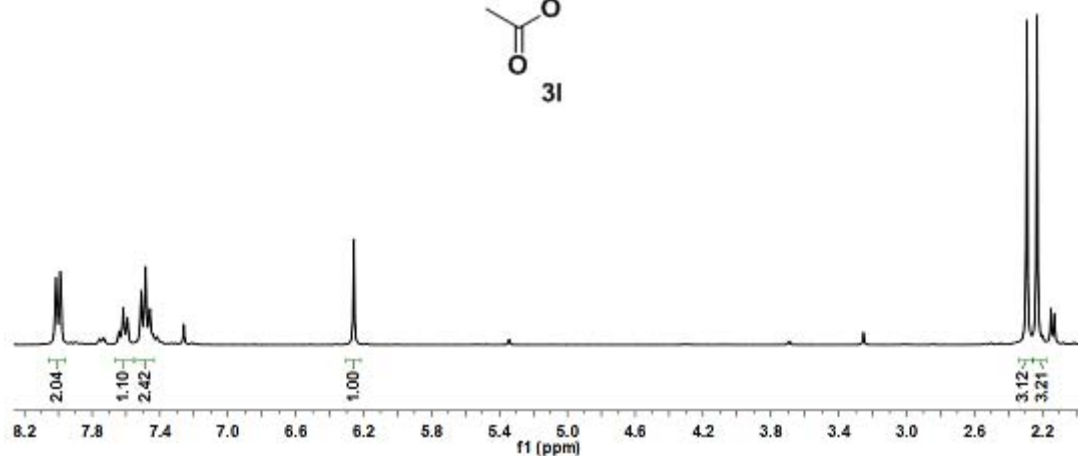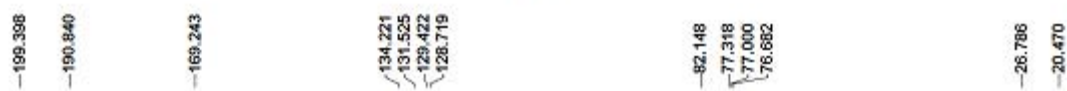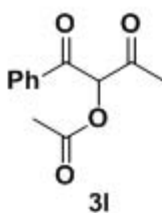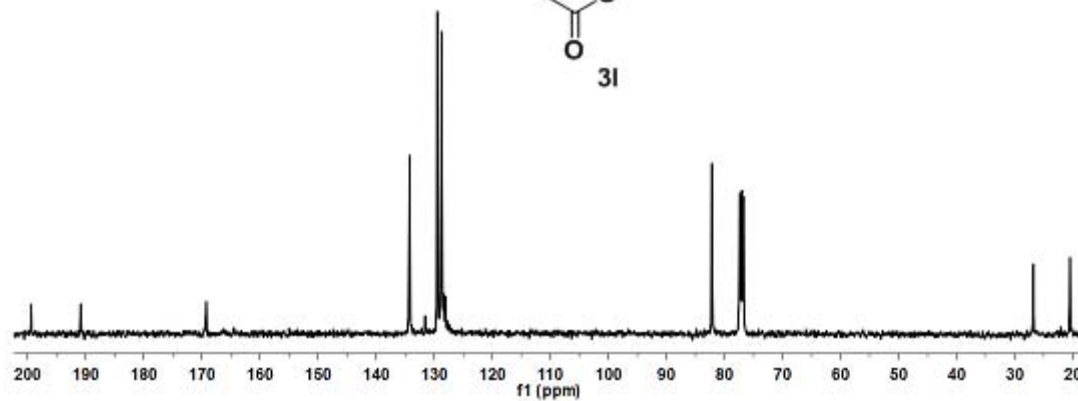

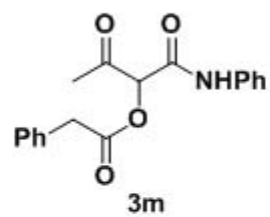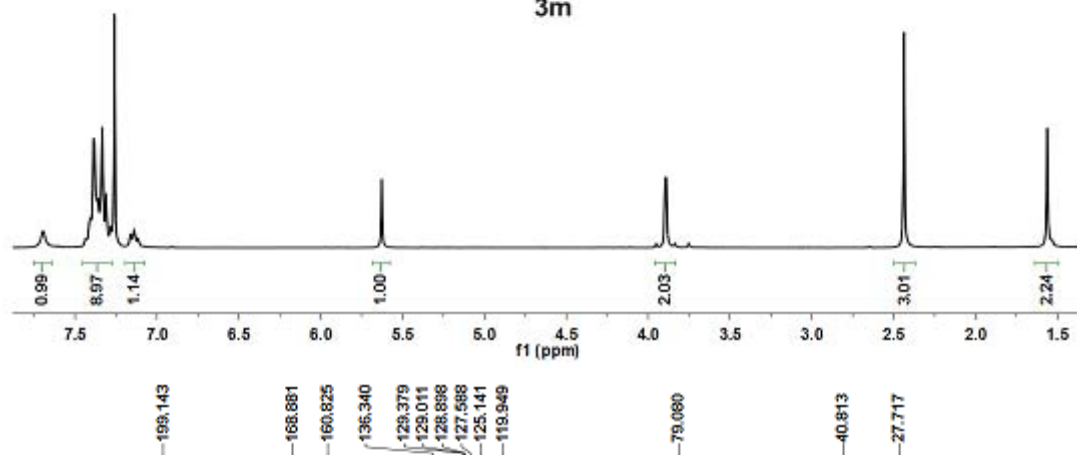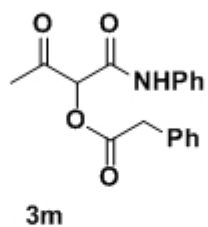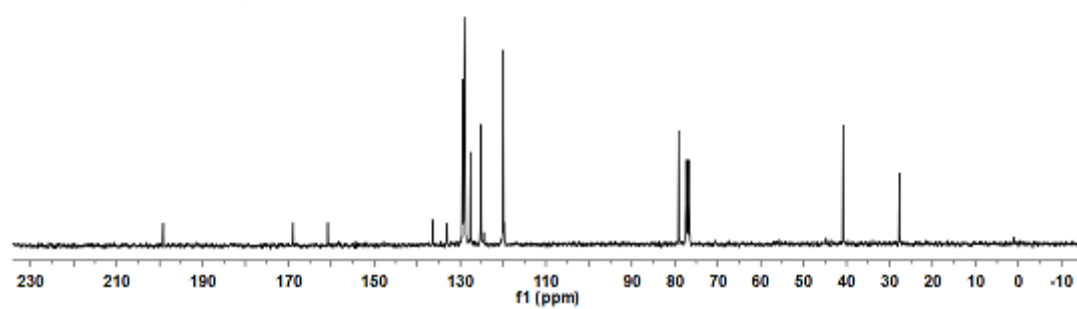

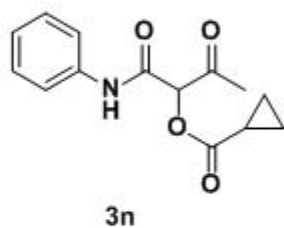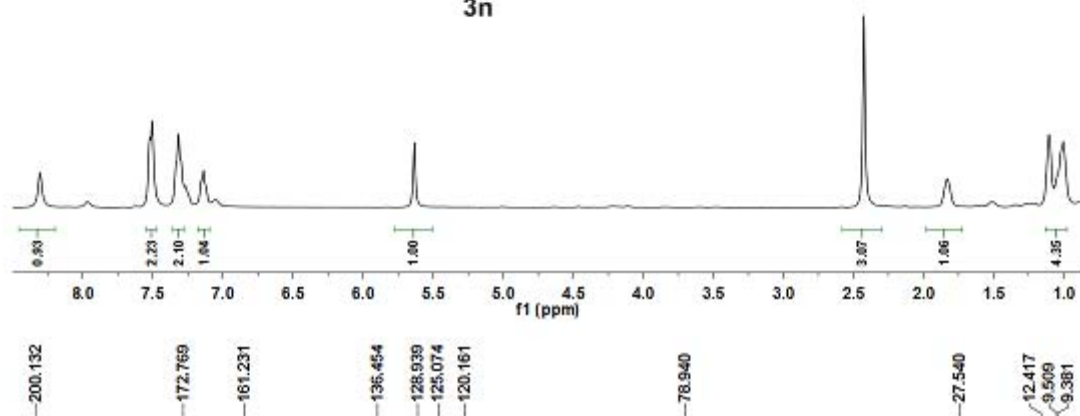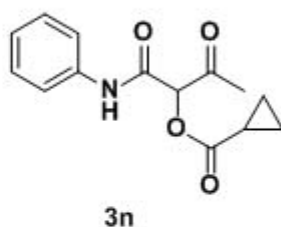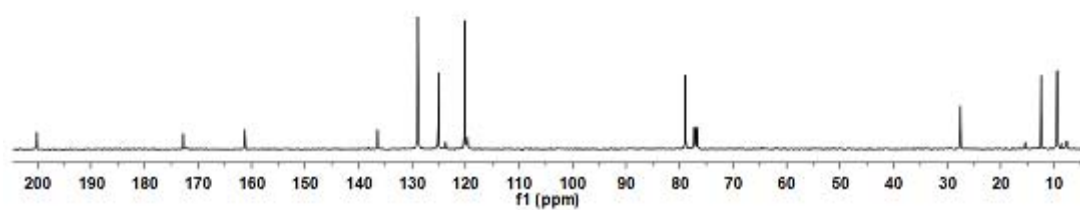

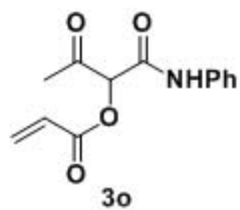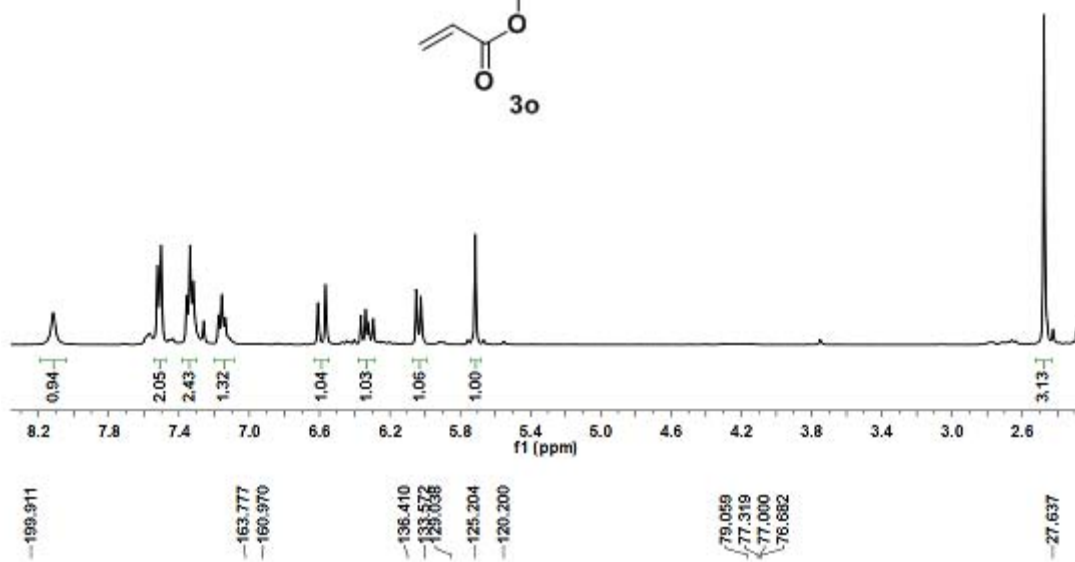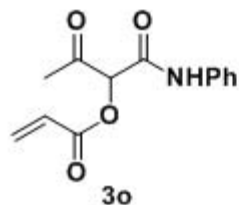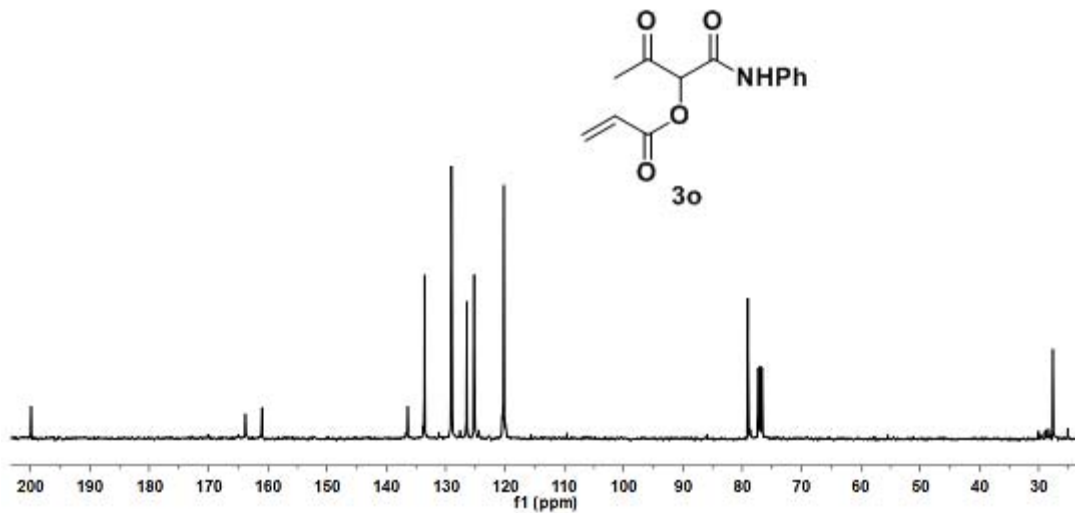

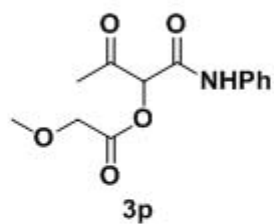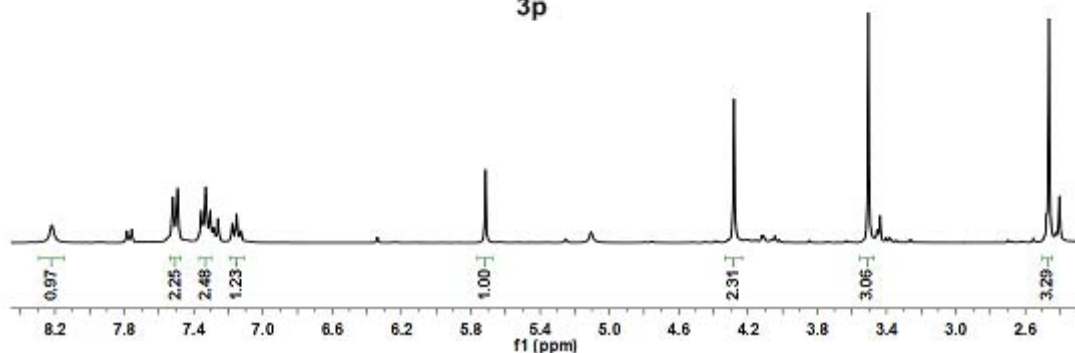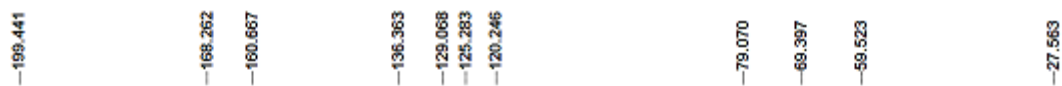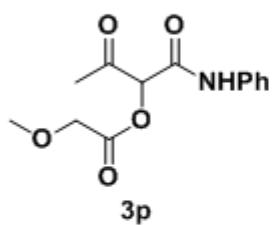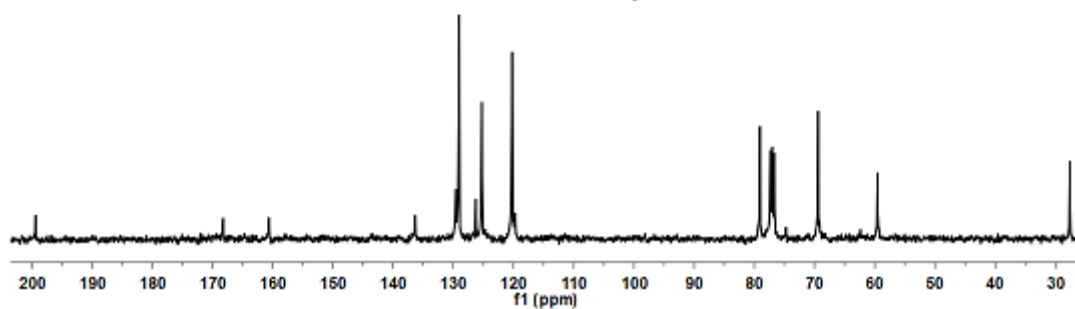



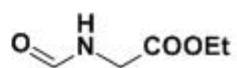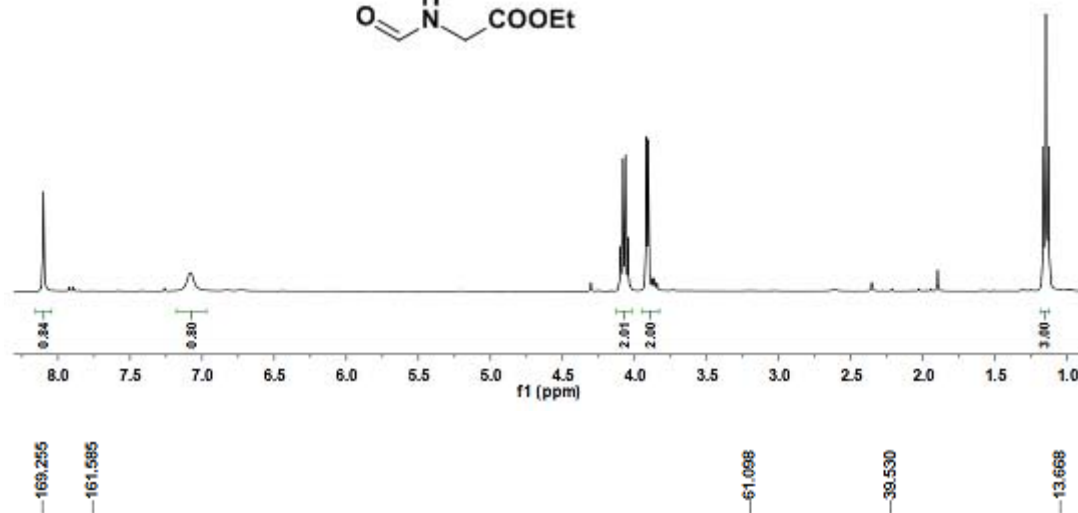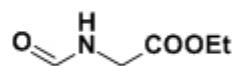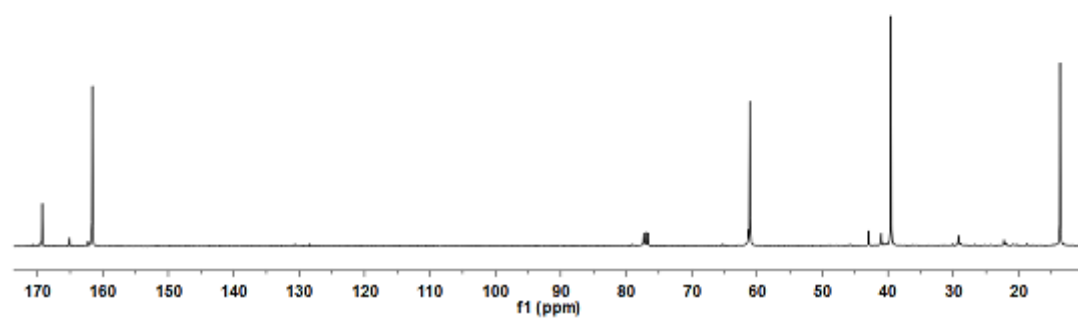

Supplement: c4cc00402g1.pdf [file c4cc00402g1.pdf]
